# Supplementary material for: Hydrothermal fabrication of hierarchical CuO nanoflowers for dual-function amperometric sensing of hydrogen peroxide and glucose
Source: Royal Society of Chemistry journal article supplement (doi:10.1039/c9nj04236a), 2019-01-01
Supplement: c9nj04236a1.pdf [file c9nj04236a1.pdf]

## Supporting information

### **Hydrothermal fabrication of hierarchical CuO nanoflower for dual-function amperometric sensing of hydrogen peroxide and glucose**

Yue Ni <sup>a,\*</sup>, Zepeng Sun <sup>a</sup>, Zhixing Zeng <sup>b</sup>, Fenwu Liu <sup>a</sup> and Junmei Qin <sup>a</sup>

<sup>a</sup> *Environmental Engineering Laboratory, College of Resource and Environment, Shanxi Agricultural University, Taigu 030801, P. R. China.*

<sup>b</sup> *CAS Key Laboratory of Chemistry of Northwestern Plant Resources and Key Laboratory for Natural Medicine of Gansu Province, Lanzhou Institute of Chemical Physics, Chinese Academy of Sciences, Lanzhou 730000, P. R. China.*

\* Corresponding author: Yue Ni

E-mail: niyue2009@sina.cn

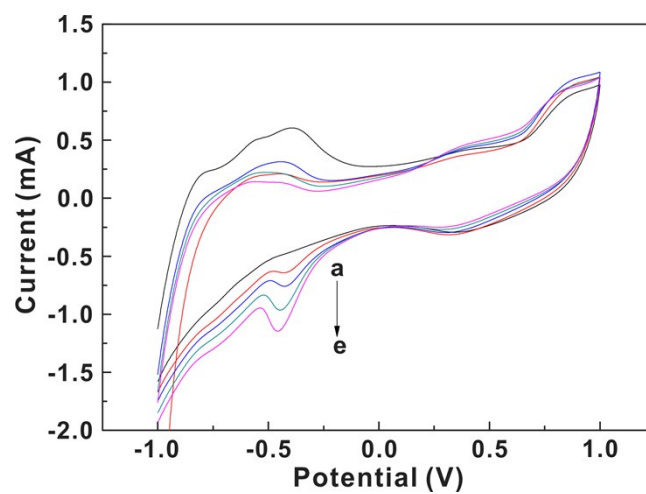

**Fig. S1** CVs of the CuO NFs/GC electrode with different concentrations of H<sub>2</sub>O<sub>2</sub> (from the top to bottom: 0 to 2.0 mM) in N<sub>2</sub>-saturated 0.1 M PBS solution (pH=7) at a scan rate of 100 mV s<sup>-1</sup>.

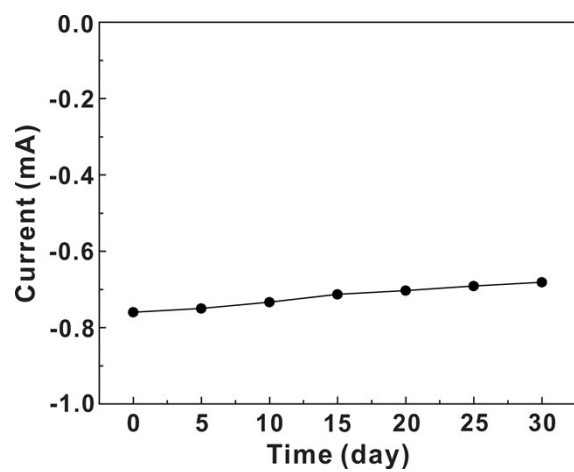

**Fig. S2** Long-term stability of CuO NFs/GC electrode for H<sub>2</sub>O<sub>2</sub> detection. Electrocatalytic current of H<sub>2</sub>O<sub>2</sub> was recorded at -0.4V.

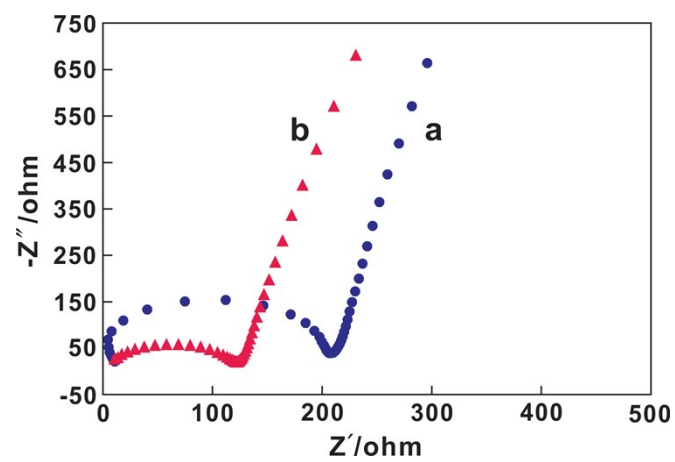

**Fig. S3** Nyquist plots of (a) bare GCE and (b) CuO NFs/GC electrode in 0.1 M KCl containing 5 mM  $[\text{Fe}(\text{CN})_6]^{3-/4-}$ .

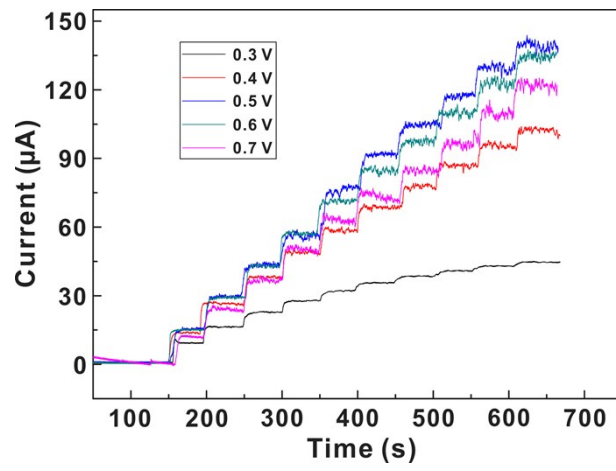

**Fig. S4** Amperometric response of CuO NFs/GC electrode at different applied potentials with successive addition of 0.2 mM glucose.

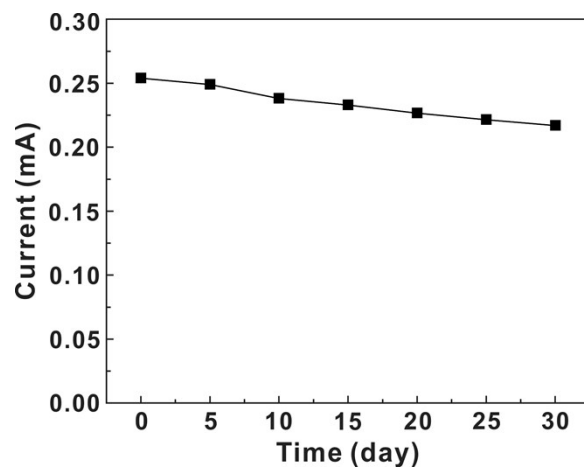

**Fig. S5** Long-term stability of CuO NFs/GC electrode for glucose detection. Electrocatalytic current of glucose was recorded at 0.5 V.
